# Supplementary material for: An Innovative Approach for Tailoring Molecularly Imprinted Polymers for Biosensors—Application to Cancer Antigen 15-3
Source: MDPI journal article supplement (doi:10.3390/bios14050222), 2024-04-30
Supplement: s1 [file s1]

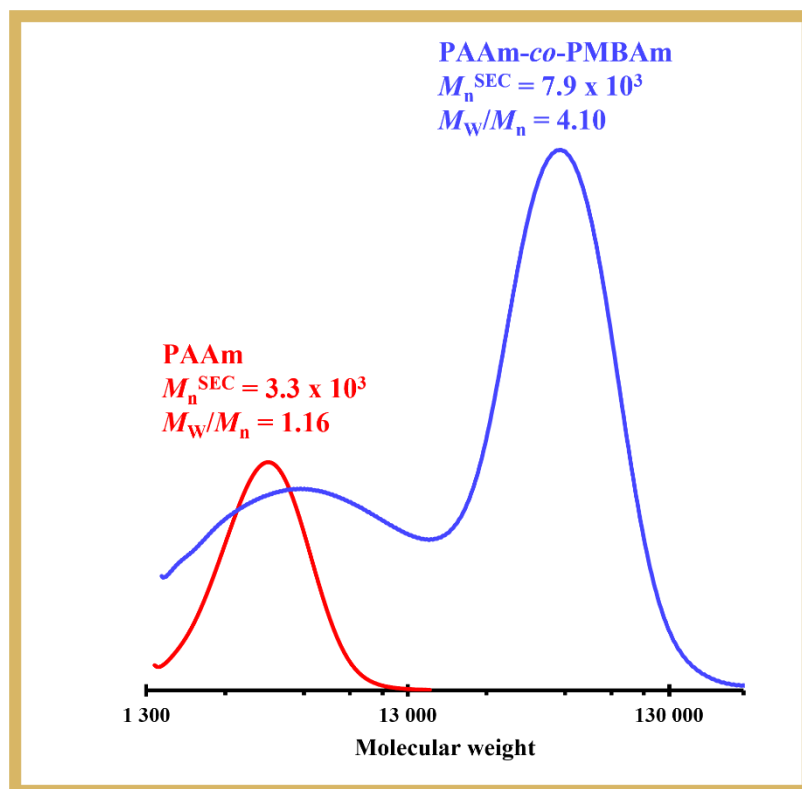

**Figure S1** – Molecular weight distribution (normalized RI signal) of PAAm homopolymer and PAAm-co-PMBAm copolymer, obtained by SEC using 0.1 M Na<sub>2</sub>SO<sub>4</sub> (aq)/1 wt% acetic acid/0.02% NaN<sub>3</sub> as the eluent.

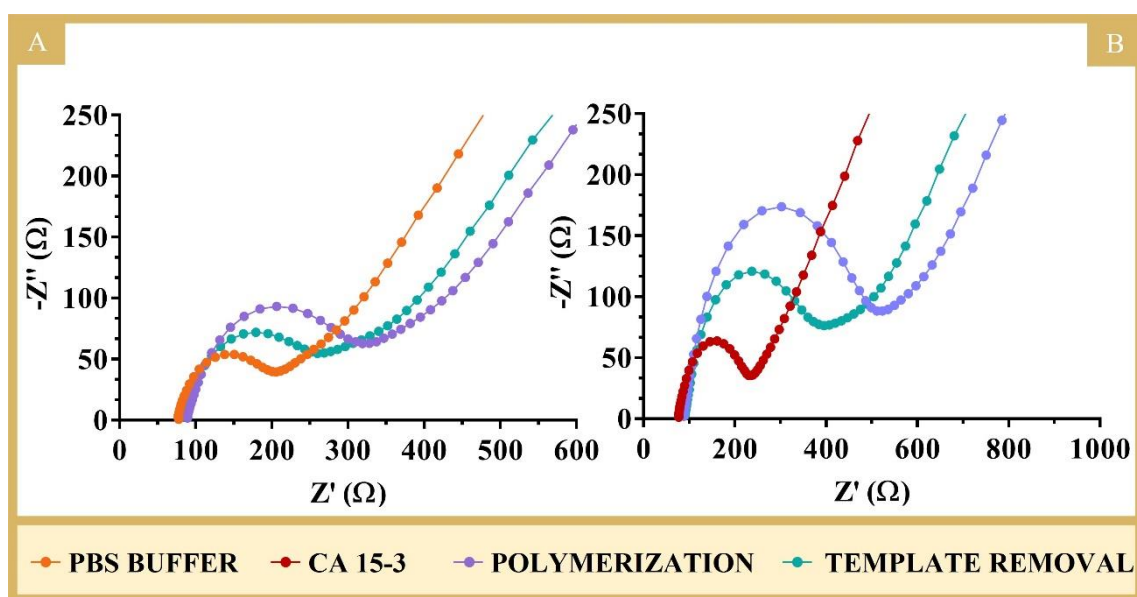

**Figure S2** – Characterization of polymerization and template removal of the NIP (A) and MIP (B) sensor. EIS Nyquist diagrams in 10 mM  $[\text{Fe}(\text{CN})_6]^{3-/4-}$  in PBS buffer 0.1 M, pH 7.4.

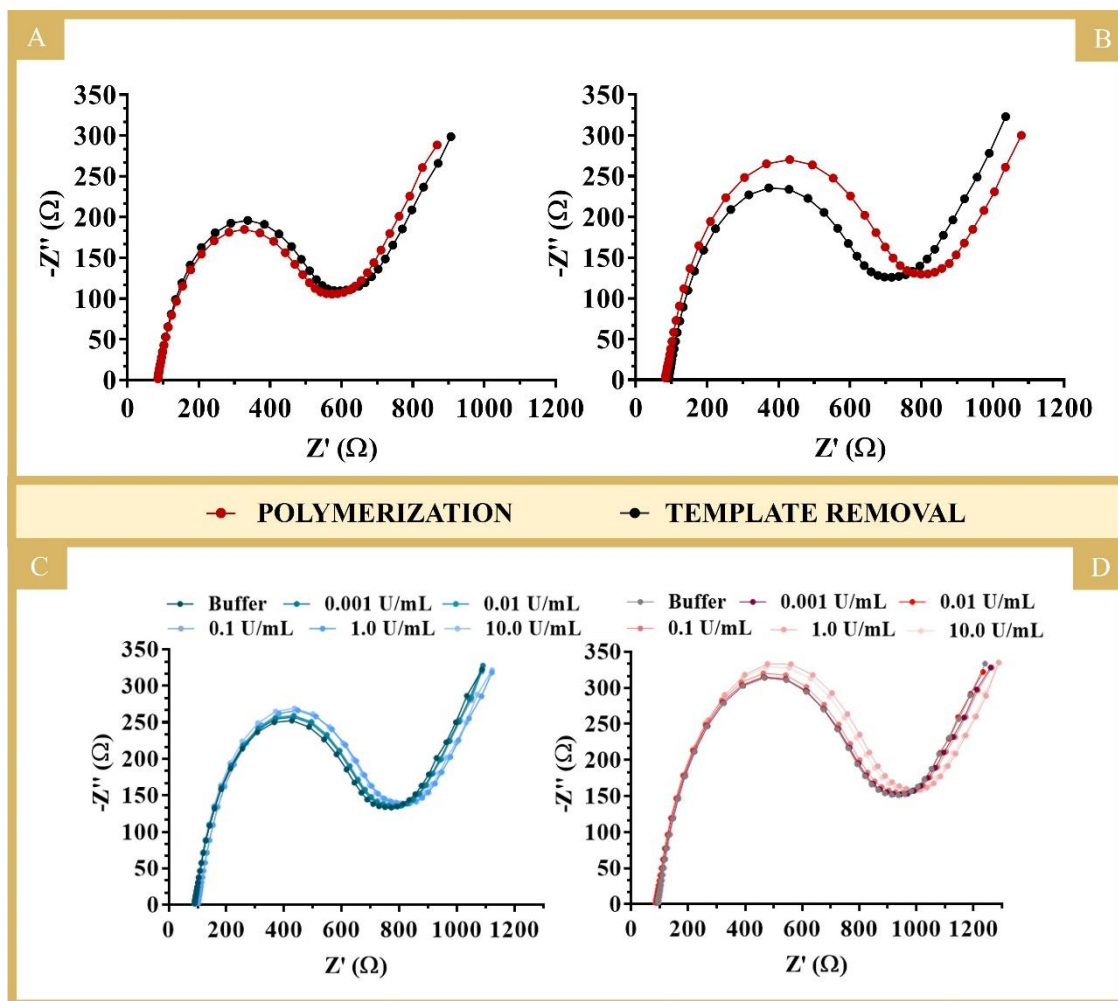

**Figure S3** – Characterization of polymerization and template removal of the NIP (A) and MIP (B) sensor. Analytical response of the NIP (C) and MIP (D) sensors. EIS Nyquist diagrams in 10 mM  $[\text{Fe}(\text{CN})_6]^{3-/4-}$  in PBS buffer 0.1 M, pH 7.4.

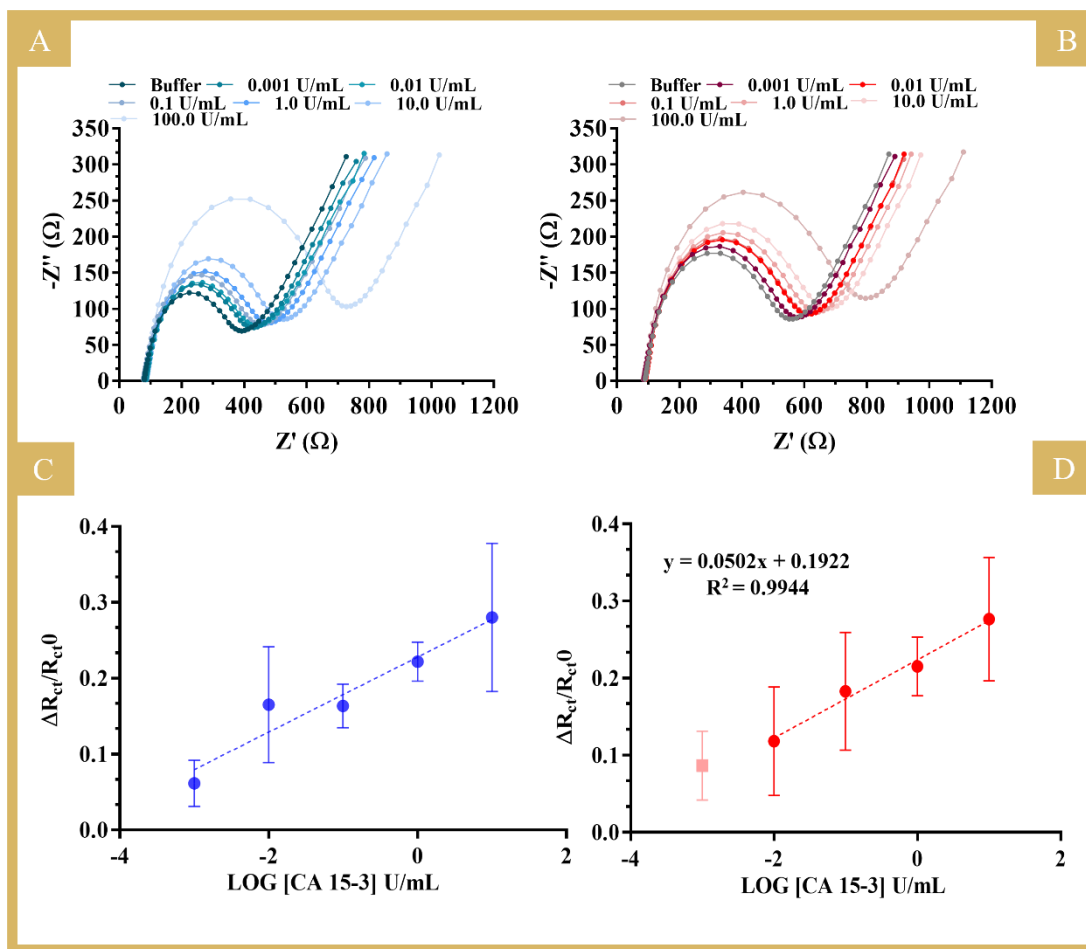

**Figure S4** – (A) and (B) EIS measurement of NIPs and MIPs, respectively, in 5 mM  $K_3[Fe(CN)_6]^{3-}$  and 5 mM  $K_4[Fe(CN)_6]^{4-}$  in PBS buffer with different concentrations of CA 15-3. (C) and (D) The corresponding calibration curves of NIP and MIP, respectively.

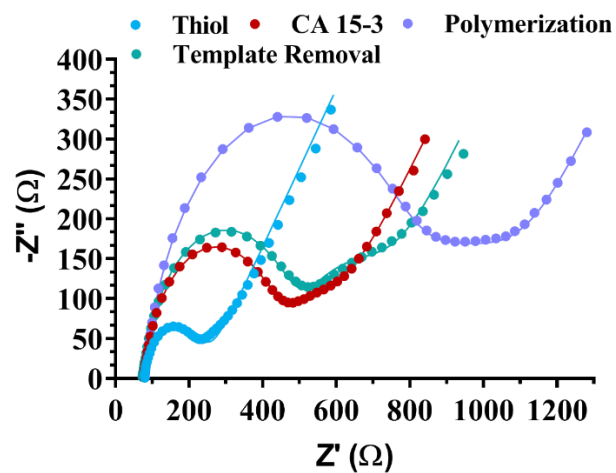

**Figure S5** – Nyquist plots of the different stages of the MIP construction. Data corresponding to the specific electrode used in the calibration in serum (Figure 7 of the main manuscript). EIS Nyquist diagrams in 10 mM  $[\text{Fe}(\text{CN})_6]^{3-/4-}$  in PBS buffer 0.1 M, pH 7.4.

**Table S1.** List of standard solutions and the corresponding mean and standard deviations, in the corresponding studies (as calculated).

| Calibrations in buffer        |                               |                      |
|-------------------------------|-------------------------------|----------------------|
| <b>NIP</b>                    | $\Delta R_{CT}/R_{CT0}$ (n=3) | SD (n=3) / Error bar |
| 0.001 U/mL                    | 0.0996507                     | 0.085736             |
| 0.01 U/mL                     | 0.0970483                     | 0.043546             |
| 0.1 U/mL                      | 0.1119657                     | 0.050676             |
| 1.0 U/mL                      | 0.2092808                     | 0.036075             |
| 10.0 U/mL                     | 0.2118485                     | 0.030271             |
| 100.0 U/mL                    | 0.2601951                     | 0.016388             |
| <b>MIP</b>                    | $\Delta R_{CT}/R_{CT0}$ (n=3) | SD (n=3) / Error bar |
| 0.001 U/mL                    | 0.0663022                     | 0.004411             |
| 0.01 U/mL                     | 0.0880527                     | 0.019621             |
| 0.1 U/mL                      | 0.1281479                     | 0.021844             |
| 1.0 U/mL                      | 0.1760057                     | 0.012011             |
| 10.0 U/mL                     | 0.2139300                     | 0.011377             |
| 100.0 U/mL                    | 0.2631117                     | 0.003427             |
| Calibrations in diluted serum |                               |                      |
| <b>NIP</b>                    | $\Delta R_{CT}/R_{CT0}$ (n=3) | SD (n=3) / Error bar |
| 0.001 U/mL                    | 0.062544                      | 0.027752             |
| 0.01 U/mL                     | 0.121017                      | 0.028090             |
| 0.1 U/mL                      | 0.137756                      | 0.026098             |
| 1.0 U/mL                      | 0.153735                      | 0.010524             |
| 10.0 U/mL                     | 0.178802                      | 0.024636             |
| 100.0 U/mL                    | 0.218767                      | 0.022992             |
| <b>MIP</b>                    | $\Delta R_{CT}/R_{CT0}$ (n=3) | SD (n=3) / Error bar |
| 0.001 U/mL                    | 0.054862                      | 0.009289             |
| 0.01 U/mL                     | 0.099178                      | 0.017912             |
| 0.1 U/mL                      | 0.141831                      | 0.022774             |
| 1.0 U/mL                      | 0.179492                      | 0.021719             |
| 10.0 U/mL                     | 0.215402                      | 0.024956             |
| 100.0 U/mL                    | 0.277863                      | 0.025463             |
| Selectivity assays            |                               |                      |
| <b>Solution components</b>    | SD (n=3) / Error bar          |                      |
| CA 15-3                       | 0.072345                      |                      |
| CA 15-3+CA 125                | 0.059541                      |                      |
| CA 15-3+CEA                   | 0.072727                      |                      |
| CA 15-3+Glucose               | 0.019555                      |                      |
| CA 15-3+Urea                  | 0.026814                      |                      |

**Table S2** – Analytical performance of sensor reported in the literature for the detection of CA 15-3.

| <b>Sensing Approach</b> | <b>Transducer</b> | <b>Response Range U/mL</b> | <b>Limit of detection U/mL</b> | <b>Reference</b> |
|-------------------------|-------------------|----------------------------|--------------------------------|------------------|
| Sensor MIP              | Electrochemical   | 0.25-10                    | 0.05                           | [1]              |
| Sensor MIP              | Electrochemical   | 0.10-100                   | 0.10                           | [2]              |
| Sensor MIP              | Electrochemical   | 5-50                       | 1.50                           | [3]              |
| Sensor MIP              | Electrochemical   | 5-35                       | 1.16                           | [4]              |
| Sensor MIP              | Electrochemical   | 0.001-100                  | ---                            | This Work        |

## References

1. Gomes, R.S., F.T.C. Moreira, R. Fernandes and M.G.F. Sales, Sensing CA 15-3 in point-of-care by electropolymerizing O-phenylenediamine (oPDA) on Au-screen printed electrodes, PLOS ONE. 13 (2018) e0196656.  
<https://doi.org/10.1371/journal.pone.0196656>.
2. Ribeiro, J.A., C.M. Pereira, A.F. Silva and M.G.F. Sales, Disposable electrochemical detection of breast cancer tumour marker CA 15-3 using poly(Toluidine Blue) as imprinted polymer receptor, Biosensors and Bioelectronics. 109 (2018) 246-254.  
<https://www.sciencedirect.com/science/article/pii/S095656631830174X>.
3. Pacheco, J.G., M.S.V. Silva, M. Freitas, H.P.A. Nouws and C. Delerue-Matos, Molecularly imprinted electrochemical sensor for the point-of-care detection of a breast cancer biomarker (CA 15-3), Sensors and Actuators B: Chemical. 256 (2018) 905-912.  
<https://www.sciencedirect.com/science/article/pii/S092540051731907X>.
4. Oliveira, A.E., Pereira, A.C., Ferreira, L.F., Disposable electropolymerized molecularly imprinted electrochemical sensor for determination of breast cancer biomarker CA 15-3 in human serum samples, Talanta, 252 (2023) 123819.  
<https://doi.org/10.1016/j.talanta.2022.123819>
